# Supplementary material
Source: Royal Society of Chemistry journal article supplement (doi:10.1039/d6ay00377j)
Supplement: d6ay00377j1.pdf [file d6ay00377j1.pdf]

## Supporting Information

# Direct inlet probe mass spectrometry with wavelength selective resonance enhanced photo ionisation

Fabian Etscheidt<sup>1,2,3</sup>, Philip Jürß<sup>1,3</sup>, Christopher P. Rüger<sup>1,3\*</sup>, Ralf Zimmermann<sup>1,3,4,5</sup>

1 – Joint Mass Spectrometry Centre / Chair of Analytical Chemistry, University of Rostock, 18059  
Rostock, Germany

2 – Photonion GmbH, 19061 Schwerin, Germany

3 – Department Life, Light & Matter (LLM), University of Rostock, 18059 Rostock, Germany

4 – Department of Chemistry and Sustainable Technology, University of Eastern Finland, 80101  
Joensuu, Finland

5 – Department of Environmental and Biological Sciences, 70211 Kuopio, Finland

\* – corresponding author: [christopher.rueger@uni-rostock.de](mailto:christopher.rueger@uni-rostock.de)

**Keywords:** atmospheric pressure laser ionisation (APLI), optical parametric oscillator (OPO), high-resolution mass spectrometry, polycyclic aromatic hydrocarbons (PAH), multiphoton ionisation, direct inlet probe (DIP)

## **Table of Content**

**Table S1:** Compound list of the standard mixture M1, including their detectability at the four used wavelengths.

**Table S2:** Compound list of the standard mixture M2, including their detectability at the four used wavelengths.

**Table S3:** Compound list of the standard mixture M3, including their detectability at the four used wavelengths.

**Table S4:** Compound list of the standard mixture M4, including their detectability at the four used wavelengths.

**Table S5:** Settings for sum formula annotation with CERES. #N, #O and #S were set to the lowest values that provided broad coverage of the sample while maintaining a low number of falsely annotated peaks.

**Figure S01:** Photographic depiction of the overall laser setup used in this study.

**Figure S02:** Venn Diagram of assigned compounds for (a) MGO, (b) oil blend, (c) parent crude oil, (d) asphaltene, (e) desulfurised asphaltene, and (f) shale oil at different wavelengths.

**Figure S03:** DBE vs carbon number plots for the CHN-class of the fossil oil samples measured at, going from left to right, 213 nm, 225 nm, 248 nm, and 266 nm, with the relative intensities of each species in a measurement.

**Figure S04:** DBE vs carbon number plots for the CHO-class of the fossil oil samples measured at, going from left to right, 213 nm, 225 nm, 248 nm, and 266 nm, with the relative intensities of each species in a measurement.

**Figure S05:** DBE vs carbon number plots for the CHS-class of the fossil oil samples measured at, going from left to right, 213 nm, 225 nm, 248 nm, and 266 nm, with the relative intensities of each species in a measurement.

**Figure S06:** DBE vs carbon number plots for the CHS<sub>2</sub>-class of the fossil oil samples measured at, going from left to right, 213 nm, 225 nm, 248 nm, and 266 nm, with the relative intensities of each species in a measurement.

**Figure S07:** DBE Distribution of the CH class of the fossil oil samples measured at, going from left to right, 213 nm, 225 nm, 248 nm, and 266 nm. The red bars represent even electron species, while the blue ones represent odd electron species as visual guidance.

**Figure S08:** DBE Distribution of the CHN class of the fossil oil samples measured at, going from left to right, 213 nm, 225 nm, 248 nm, and 266 nm. The red bars represent even electron species, while the blue ones represent odd electron species as visual guidance.

**Figure S09:** DBE Distribution of the CHO class of the fossil oil samples measured at, going from left to right, 213 nm, 225 nm, 248 nm, and 266 nm. The red bars represent even electron species, while the blue ones represent odd electron species as visual guidance.

**Figure S10:** DBE Distribution of the CHS class of the fossil oil samples measured at, going from left to right, 213 nm, 225 nm, 248 nm, and 266 nm. The red bars represent even electron species, while the blue ones represent odd electron species as visual guidance.

**Figure S11:** DBE Distribution of the CHS<sub>2</sub> class of the fossil oil samples measured at, going from left to right, 213 nm, 225 nm, 248 nm, and 266 nm. The red bars represent even electron species, while the blue ones represent odd electron species as visual guidance.

**Figure S12:** Congruence coefficients between polymer samples measured at different wavelengths for (a) polystyrene and (b) rubber.

**Figure S13:** Total ion intensities of polymer samples measured at different wavelengths for (a) polystyrene and (b) rubber.

**Table S1:** Compound list of the standard mixture M1, including their detectability at the four used wavelengths.

| Compound                        | Sum Formula                                    | Exact mass [Da] | concentration [g/L] | 213 nm | 225 nm | 248 nm | 266 nm |
|---------------------------------|------------------------------------------------|-----------------|---------------------|--------|--------|--------|--------|
| Indole                          | C <sub>8</sub> H <sub>7</sub> N                | 117.057849      | 0.05                | no     | no     | no     | no     |
| Naphthalene                     | C <sub>10</sub> H <sub>8</sub>                 | 128.062600      | 0.04                | yes    | no     | no     | yes    |
| Cinnamaldehyde                  | C <sub>9</sub> H <sub>8</sub> O                | 132.057515      | 0.04                | no     | no     | no     | no     |
| 1-Naphthylamine                 | C <sub>10</sub> H <sub>9</sub> N               | 143.073499      | 0.04                | yes    | yes    | yes    | no     |
| 4-Ethylguaicol                  | C <sub>9</sub> H <sub>12</sub> O <sub>2</sub>  | 152.083730      | 0.04                | yes    | yes    | no     | yes    |
| Biphenyl                        | C <sub>12</sub> H <sub>10</sub>                | 154.078250      | 0.04                | no     | no     | no     | no     |
| 2-Phenylthiophene               | C <sub>10</sub> H <sub>8</sub> S               | 160.034672      | 0.04                | no     | no     | no     | no     |
| 1H-Benzo[g]indole               | C <sub>12</sub> H <sub>9</sub> N               | 167.073499      | 0.04                | yes    | yes    | yes    | yes    |
| 2,4,5-Trimethylnaphthalene      | C <sub>13</sub> H <sub>14</sub>                | 170.109550      | 0.04                | yes    | yes    | yes    | yes    |
| Anthracene                      | C <sub>14</sub> H <sub>10</sub>                | 178.078250      | 0.04                | yes    | yes    | yes    | yes    |
| Acridine                        | C <sub>13</sub> H <sub>9</sub> N               | 179.073499      | 0.04                | no     | no     | no     | no     |
| 2-Phenylindene                  | C <sub>15</sub> H <sub>12</sub>                | 192.093900      | 0.03                | yes    | yes    | yes    | yes    |
| Pyrene                          | C <sub>16</sub> H <sub>10</sub>                | 202.078250      | 0.02                | yes    | yes    | yes    | yes    |
| 1,1,2-Trimethylbenz[e]indole    | C <sub>15</sub> H <sub>15</sub> N              | 209.120449      | 0.02                | yes    | no     | yes    | no     |
| 4,6-Dimethyldibenzothiophene    | C <sub>14</sub> H <sub>12</sub> S              | 212.065972      | 0.02                | yes    | yes    | yes    | yes    |
| 9-Nitrophenantrene              | C <sub>14</sub> H <sub>9</sub> NO <sub>2</sub> | 223.063329      | 0.02                | no     | no     | no     | no     |
| Naphtho[1,2-b:5,6-b]dithiophene | C <sub>14</sub> H <sub>8</sub> S <sub>2</sub>  | 240.006744      | 0.02                | yes    | yes    | yes    | yes    |
| Methylpalmitate                 | C <sub>17</sub> H <sub>34</sub> O <sub>2</sub> | 270.255880      | 0.02                | no     | no     | no     | no     |
| 6,13-Pentacenequinone           | C <sub>22</sub> H <sub>12</sub> O <sub>2</sub> | 308.083730      | 0.02                | no     | no     | no     | no     |

**Table S2:** Compound list of the standard mixture M2, including their detectability at the four used wavelengths.

| Compound                     | Sum Formula                                     | Exact mass [Da] | concentration [g/L] | 213 nm | 225 nm | 248 nm | 266 nm |
|------------------------------|-------------------------------------------------|-----------------|---------------------|--------|--------|--------|--------|
| Benzofuran                   | C <sub>8</sub> H <sub>6</sub> O                 | 118.041865      | 0.05                | no     | no     | no     | no     |
| Azulene                      | C <sub>10</sub> H <sub>8</sub>                  | 128.062600      | 0.04                | yes    | no     | no     | no     |
| 2-Methylbenzofuran           | C <sub>9</sub> H <sub>8</sub> O                 | 132.057515      | 0.04                | no     | no     | no     | no     |
| 2-Methylthianaphthene        | C <sub>9</sub> H <sub>8</sub> S                 | 148.034672      | 0.04                | no     | no     | no     | no     |
| Acenaphthylene               | C <sub>12</sub> H <sub>8</sub>                  | 152.062600      | 0.04                | no     | no     | no     | no     |
| 1,4-Dimethylnaphthalene      | C <sub>12</sub> H <sub>12</sub>                 | 156.093900      | 0.04                | yes    | yes    | yes    | yes    |
| Eugenol                      | C <sub>10</sub> H <sub>12</sub> O <sub>2</sub>  | 164.083730      | 0.04                | yes    | no     | no     | yes    |
| Dibenzofuran                 | C <sub>12</sub> H <sub>8</sub> O                | 168.057515      | 0.04                | yes    | yes    | yes    | yes    |
| Coniferyl aldehyde           | C <sub>10</sub> H <sub>10</sub> O <sub>3</sub>  | 178.062995      | 0.04                | no     | no     | no     | no     |
| 9,10-Dihydroanthracene       | C <sub>14</sub> H <sub>12</sub>                 | 180.093900      | 0.03                | no     | no     | no     | yes    |
| 2,6-Diethylnaphthalene       | C <sub>14</sub> H <sub>16</sub>                 | 184.125200      | 0.03                | yes    | yes    | yes    | yes    |
| Ferulic acid                 | C <sub>10</sub> H <sub>10</sub> O <sub>4</sub>  | 194.057910      | 0.03                | no     | no     | no     | no     |
| Fluoranthene                 | C <sub>16</sub> H <sub>10</sub>                 | 202.078250      | 0.02                | yes    | yes    | yes    | yes    |
| Sinapyl alcohol              | C <sub>11</sub> H <sub>14</sub> O <sub>4</sub>  | 210.089210      | 0.02                | no     | no     | no     | no     |
| Dibenzothiophene-S,S-dioxide | C <sub>12</sub> H <sub>8</sub> O <sub>2</sub> S | 216.024502      | 0.02                | no     | no     | no     | no     |
| Chrysene                     | C <sub>18</sub> H <sub>12</sub>                 | 228.093900      | 0.02                | yes    | yes    | yes    | yes    |
| Indeno[1,2,3-cd]pyrene       | C <sub>22</sub> H <sub>12</sub>                 | 276.093900      | 0.02                | yes    | yes    | yes    | yes    |
| 5- $\alpha$ -Cholestane      | C <sub>27</sub> H <sub>48</sub>                 | 372.375600      | 0.02                | no     | no     | no     | no     |

**Table S3:** Compound list of the standard mixture M3, including their detectability at the four used wavelengths.

| Compound                 | Sum Formula                                   | Exact mass [Da] | concentration [g/L] | 213 nm | 225 nm | 248 nm | 266 nm |
|--------------------------|-----------------------------------------------|-----------------|---------------------|--------|--------|--------|--------|
| 4-Methylbenzothiol       | C <sub>7</sub> H <sub>8</sub> S               | 124.034672      | 0.04                | no     | no     | no     | no     |
| 2-Methylindene           | C <sub>10</sub> H <sub>10</sub>               | 130.078250      | 0.04                | no     | no     | no     | no     |
| Benzothiophene           | C <sub>8</sub> H <sub>6</sub> S               | 134.019022      | 0.04                | no     | no     | no     | no     |
| 2-Methoxyl-4-vinylphenol | C <sub>9</sub> H <sub>10</sub> O <sub>2</sub> | 150.068080      | 0.04                | no     | no     | no     | no     |
| Vanillyl alcohol         | C <sub>8</sub> H <sub>10</sub> O <sub>3</sub> | 154.062995      | 0.04                | no     | no     | no     | no     |
| 2-Ethyl-naphthalene      | C <sub>12</sub> H <sub>12</sub>               | 156.093900      | 0.04                | yes    | yes    | yes    | yes    |
| Fluorene                 | C <sub>13</sub> H <sub>10</sub>               | 166.078250      | 0.04                | yes    | yes    | yes    | yes    |
| 3-Hexylthiophene         | C <sub>10</sub> H <sub>16</sub> S             | 168.097272      | 0.04                | no     | no     | no     | no     |
| Phenanthrene             | C <sub>14</sub> H <sub>10</sub>               | 178.078250      | 0.04                | yes    | yes    | yes    | yes    |
| Fluorenone               | C <sub>13</sub> H <sub>8</sub> O              | 180.057515      | 0.03                | no     | no     | no     | no     |
| 3-Methylphenantrene      | C <sub>15</sub> H <sub>12</sub>               | 192.093900      | 0.03                | yes    | yes    | yes    | yes    |
| Anthrone                 | C <sub>14</sub> H <sub>10</sub> O             | 194.073165      | 0.03                | yes    | no     | no     | no     |
| 1-Phenyl-naphthalene     | C <sub>16</sub> H <sub>12</sub>               | 204.093900      | 0.02                | yes    | yes    | yes    | yes    |
| 1,3-Diphenylacetone      | C <sub>15</sub> H <sub>14</sub> O             | 210.104465      | 0.02                | no     | no     | no     | no     |
| 1-Methylpyrene           | C <sub>17</sub> H <sub>12</sub>               | 216.093900      | 0.02                | yes    | yes    | yes    | yes    |
| Triphenylene             | C <sub>18</sub> H <sub>12</sub>               | 228.093900      | 0.02                | yes    | yes    | yes    | yes    |
| Benzo[a]pyrene           | C <sub>20</sub> H <sub>12</sub>               | 252.093900      | 0.02                | yes    | yes    | yes    | yes    |
| Dibenzo[a,b]anthracene   | C <sub>22</sub> H <sub>14</sub>               | 278.109550      | 0.02                | yes    | yes    | yes    | yes    |

**Table S4:** Compound list of the standard mixture M4, including their detectability at the four used wavelengths.

| Compound               | Sum Formula                                    | Exact mass [Da] | concentration [g/L] | 213 nm | 225 nm | 248 nm | 266 nm |
|------------------------|------------------------------------------------|-----------------|---------------------|--------|--------|--------|--------|
| Guaiacol               | C <sub>7</sub> H <sub>8</sub> O <sub>2</sub>   | 124.052430      | 0.04                | no     | no     | no     | no     |
| 2-Methylindole         | C <sub>9</sub> H <sub>9</sub> N                | 131.073499      | 0.04                | yes    | yes    | no     | no     |
| 2-Methylnaphthalene    | C <sub>11</sub> H <sub>10</sub>                | 142.078250      | 0.04                | yes    | yes    | no     | yes    |
| Vanillin               | C <sub>8</sub> H <sub>8</sub> O <sub>3</sub>   | 152.047345      | 0.04                | no     | no     | no     | no     |
| Acenaphthene           | C <sub>12</sub> H <sub>10</sub>                | 154.078250      | 0.04                | yes    | yes    | no     | yes    |
| 2-Naphthalenethiol     | C <sub>10</sub> H <sub>8</sub> S               | 160.034672      | 0.04                | no     | no     | no     | no     |
| Carbazole              | C <sub>12</sub> H <sub>9</sub> N               | 167.073499      | 0.04                | yes    | yes    | yes    | yes    |
| Diphenylmethane        | C <sub>13</sub> H <sub>12</sub>                | 168.093900      | 0.04                | no     | no     | no     | no     |
| 1,1-Diphenylethylene   | C <sub>14</sub> H <sub>12</sub>                | 180.093900      | 0.03                | no     | no     | no     | no     |
| Dibenzothiophene       | C <sub>12</sub> H <sub>8</sub> S               | 184.034672      | 0.03                | yes    | yes    | no     | no     |
| 2-Methylantracene      | C <sub>15</sub> H <sub>12</sub>                | 192.093900      | 0.03                | yes    | yes    | yes    | yes    |
| 3-Ethylcarbazole       | C <sub>14</sub> H <sub>13</sub> N              | 195.104799      | 0.03                | yes    | yes    | yes    | yes    |
| Anthraquinone          | C <sub>14</sub> H <sub>8</sub> O <sub>2</sub>  | 208.052430      | 0.02                | no     | no     | no     | no     |
| 2-Nitrofluorene        | C <sub>13</sub> H <sub>9</sub> NO <sub>2</sub> | 211.063329      | 0.02                | no     | no     | no     | no     |
| 2-Methylantraquinone   | C <sub>15</sub> H <sub>10</sub> O <sub>2</sub> | 222.068080      | 0.02                | no     | no     | no     | no     |
| Retene                 | C <sub>18</sub> H <sub>18</sub>                | 234.140850      | 0.02                | yes    | yes    | yes    | yes    |
| 5,12-Naphthacenquinone | C <sub>18</sub> H <sub>10</sub> O <sub>2</sub> | 258.068080      | 0.02                | no     | no     | no     | no     |
| Coronene               | C <sub>24</sub> H <sub>12</sub>                | 300.093900      | 0.02                | yes    | yes    | yes    | yes    |



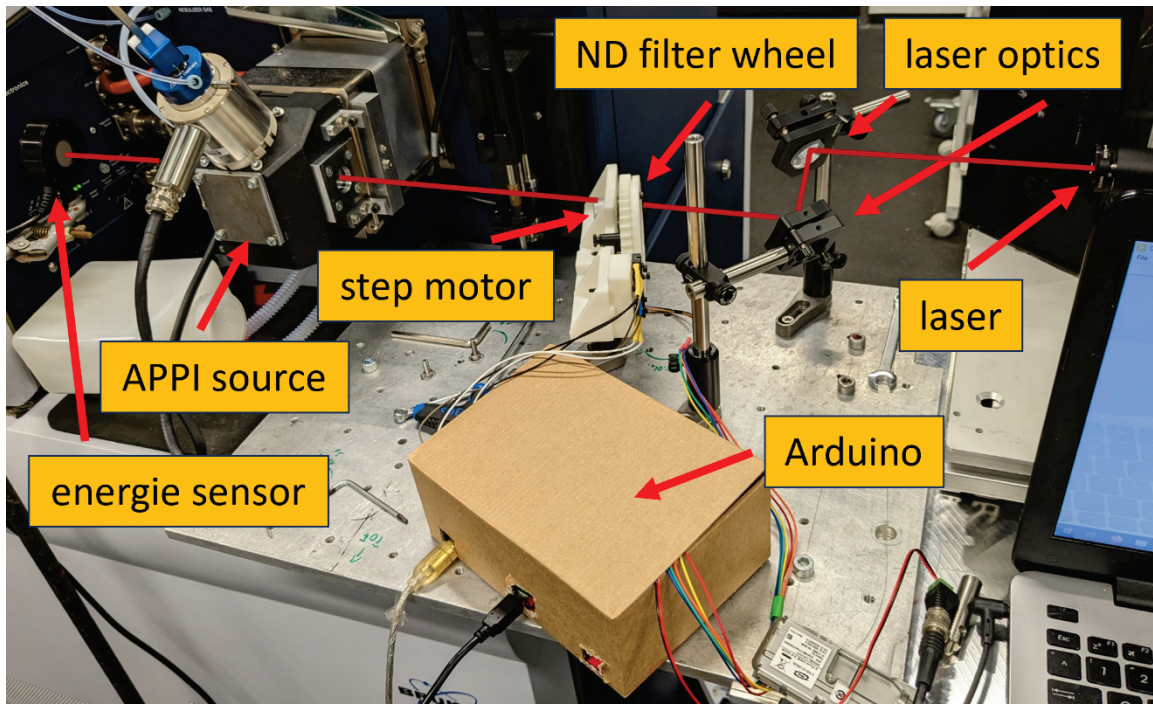

**Figure S01:** Photographic depiction of the overall laser setup used in this study.

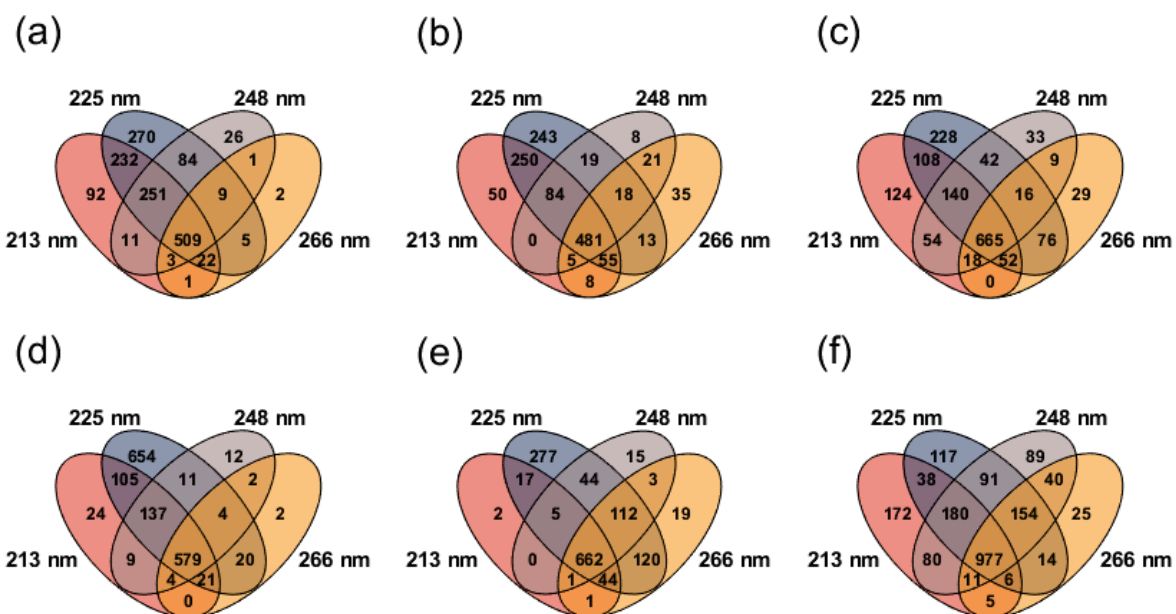

**Figure S02:** Venn Diagram of assigned compounds for (a) MGO, (b) oil blend, (c) parent crude oil, (d) asphaltene, (e) desulfurized asphaltene, and (f) shale oil at different wavelengths.

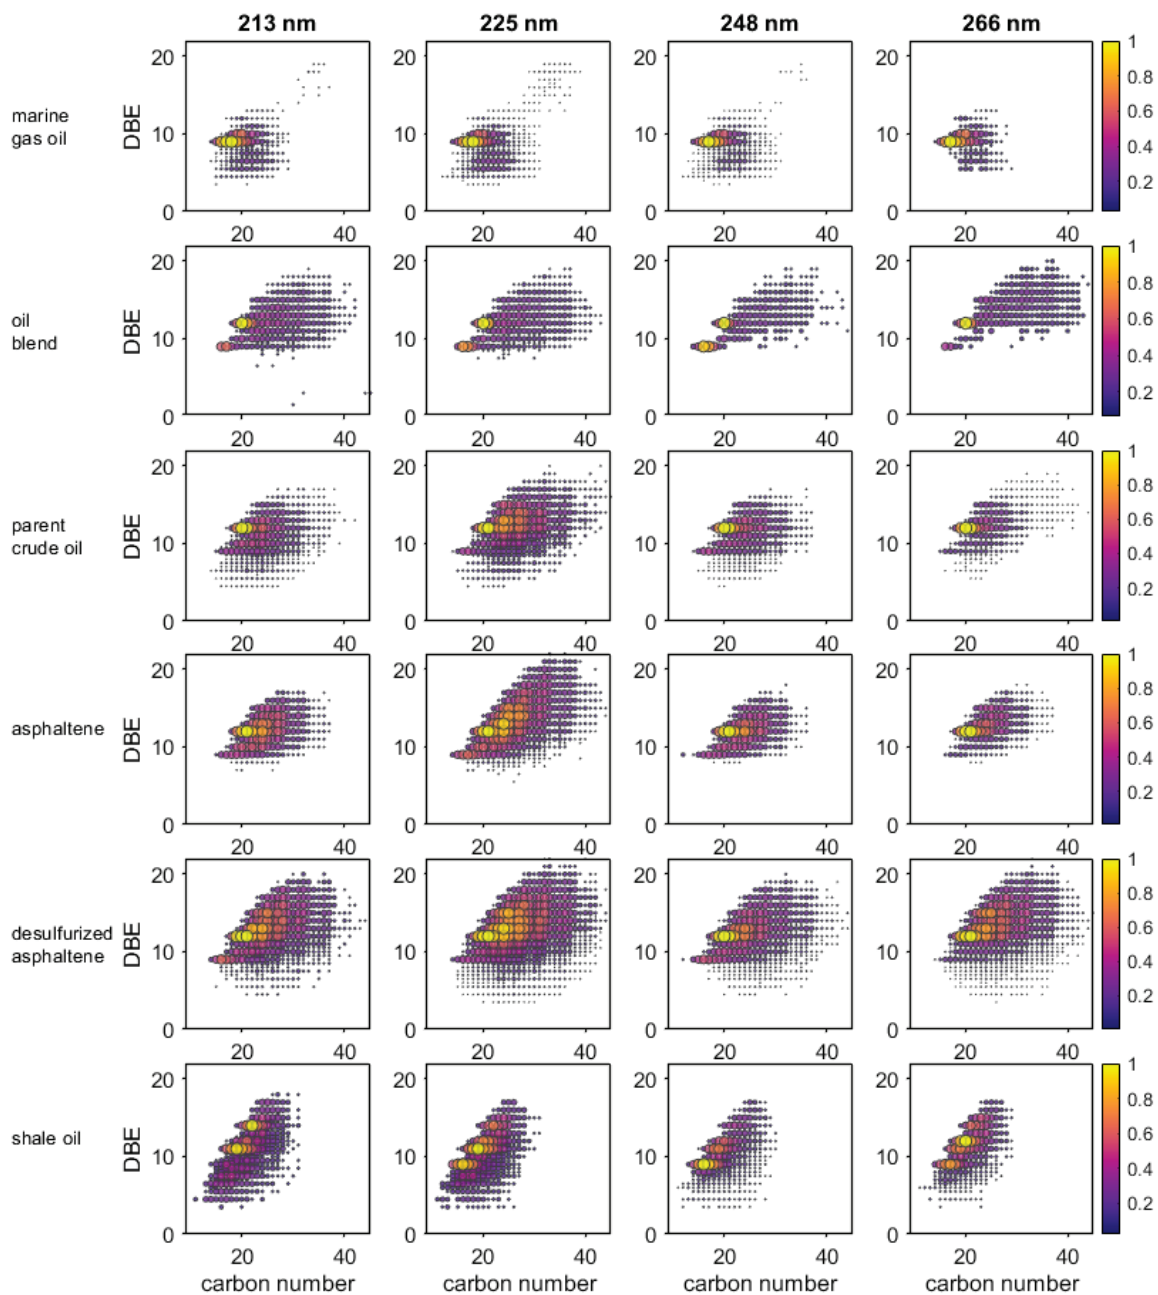

**Figure S03:** DBE vs carbon number plots for the CHN-class of the fossil oil samples measured at, going from left to right, 213 nm, 225 nm, 248 nm, and 266 nm, with the relative intensities of each species in a measurement.

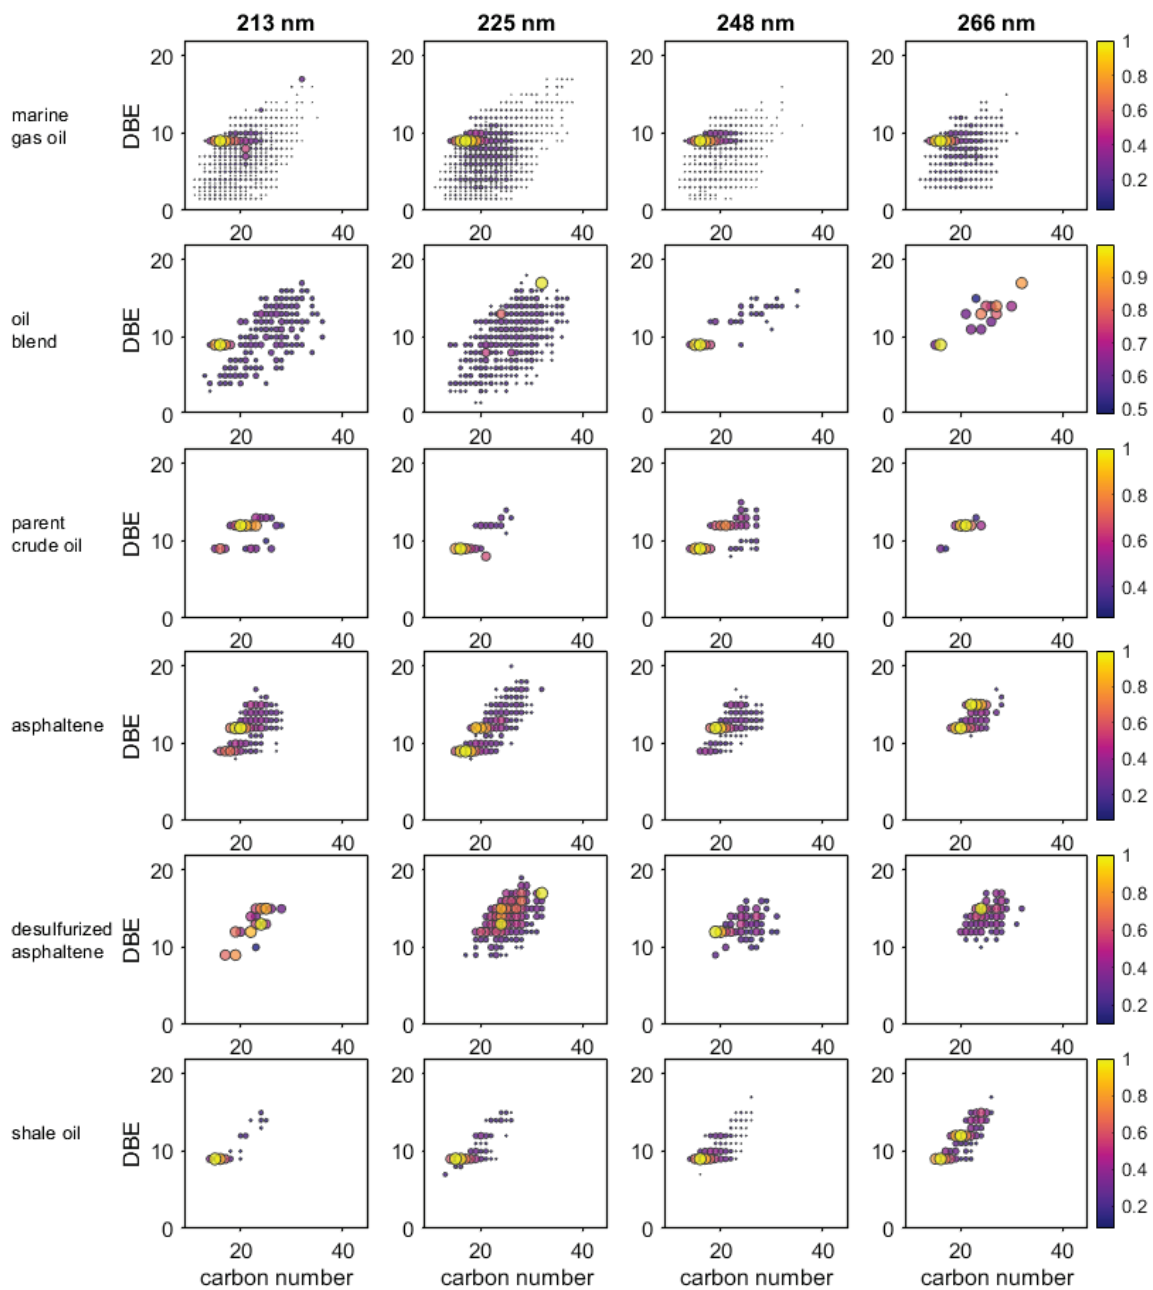

**Figure S04:** DBE vs carbon number plots for the CHO-class of the fossil oil samples measured at, going from left to right, 213 nm, 225 nm, 248 nm, and 266 nm, with the relative intensities of each species in a measurement.

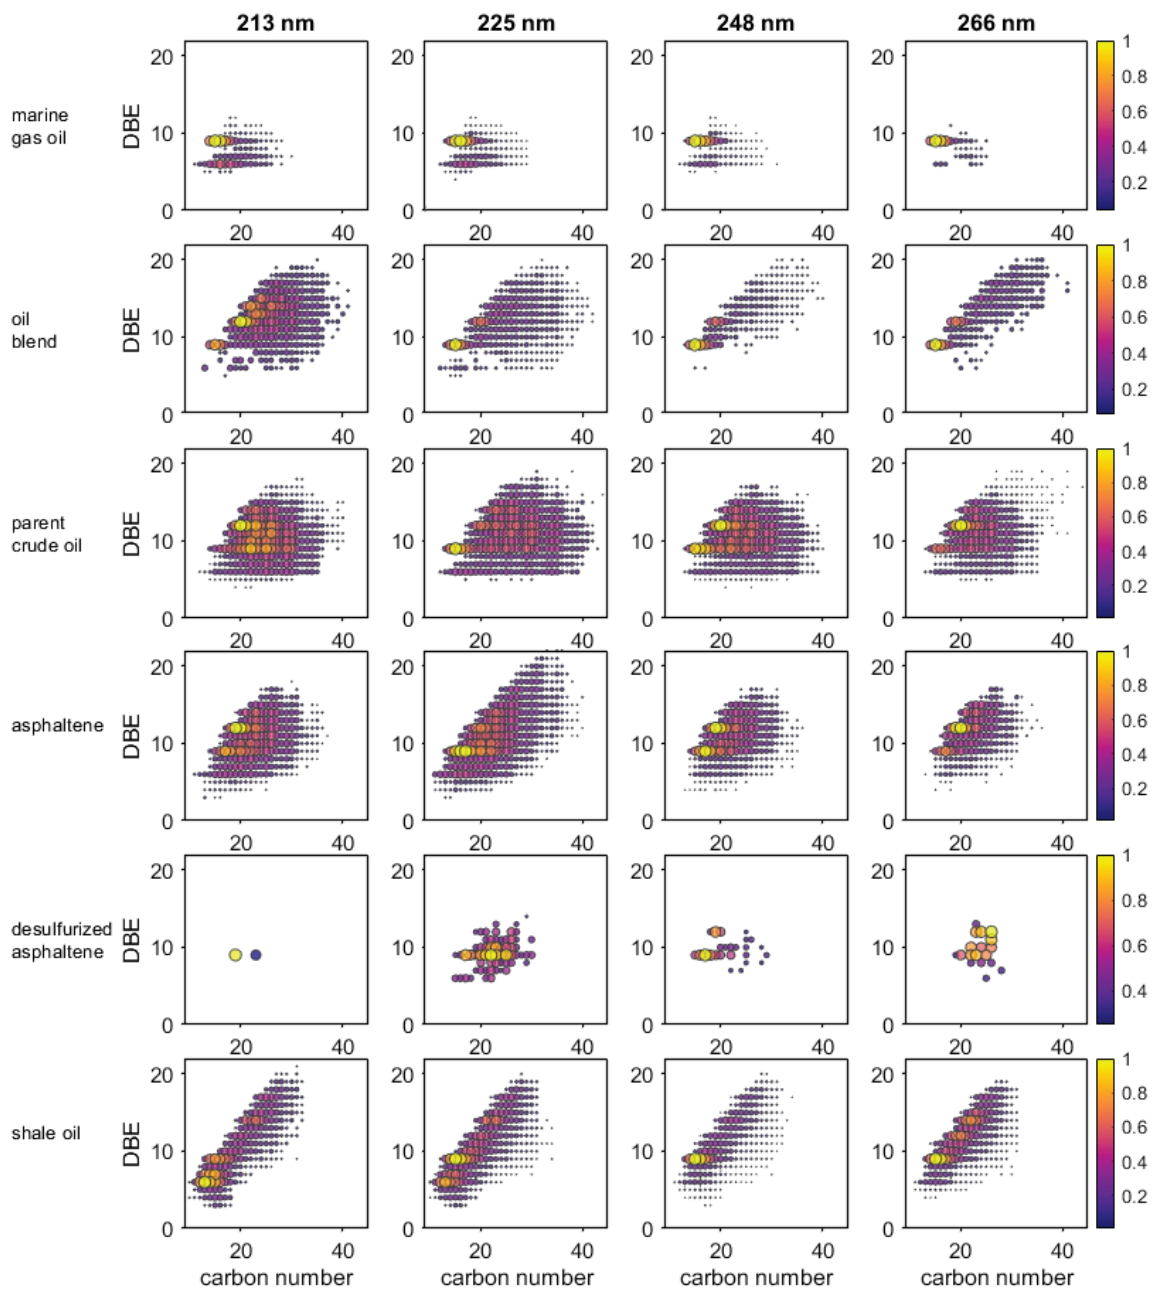

**Figure S05:** DBE vs carbon number plots for the CHS-class of the fossil oil samples measured at, going from left to right, 213 nm, 225 nm, 248 nm, and 266 nm, with the relative intensities of each species in a measurement.

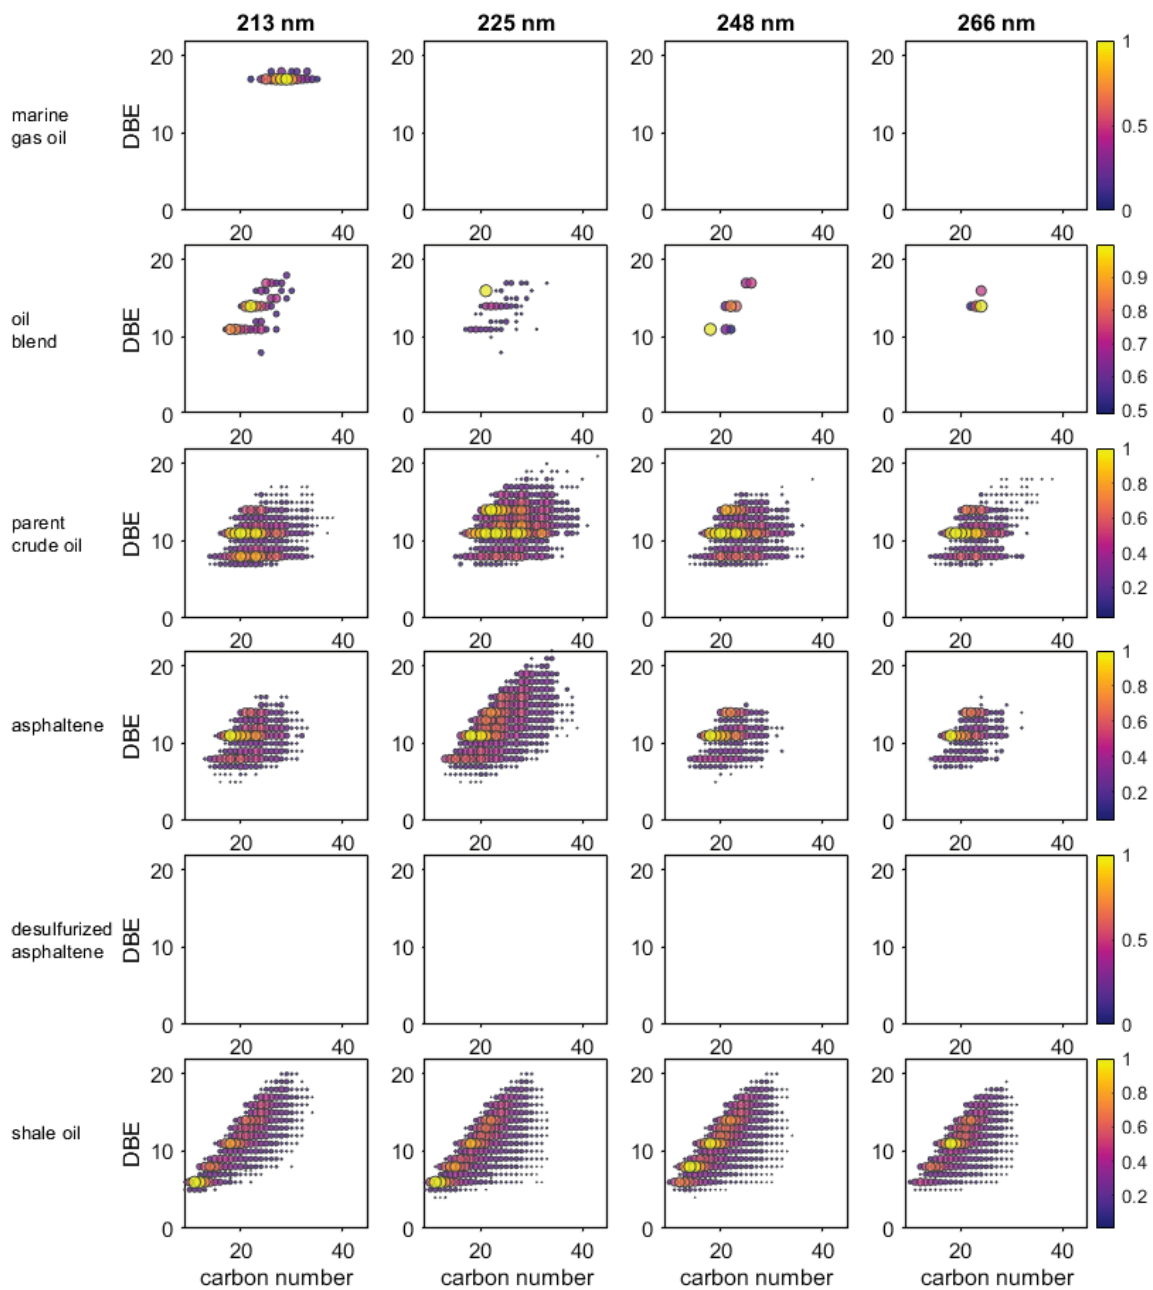

**Figure S06:** DBE vs carbon number plots for the CHS2-class of the fossil oil samples measured at, going from left to right, 213 nm, 225 nm, 248 nm, and 266 nm, with the relative intensities of each species in a measurement.

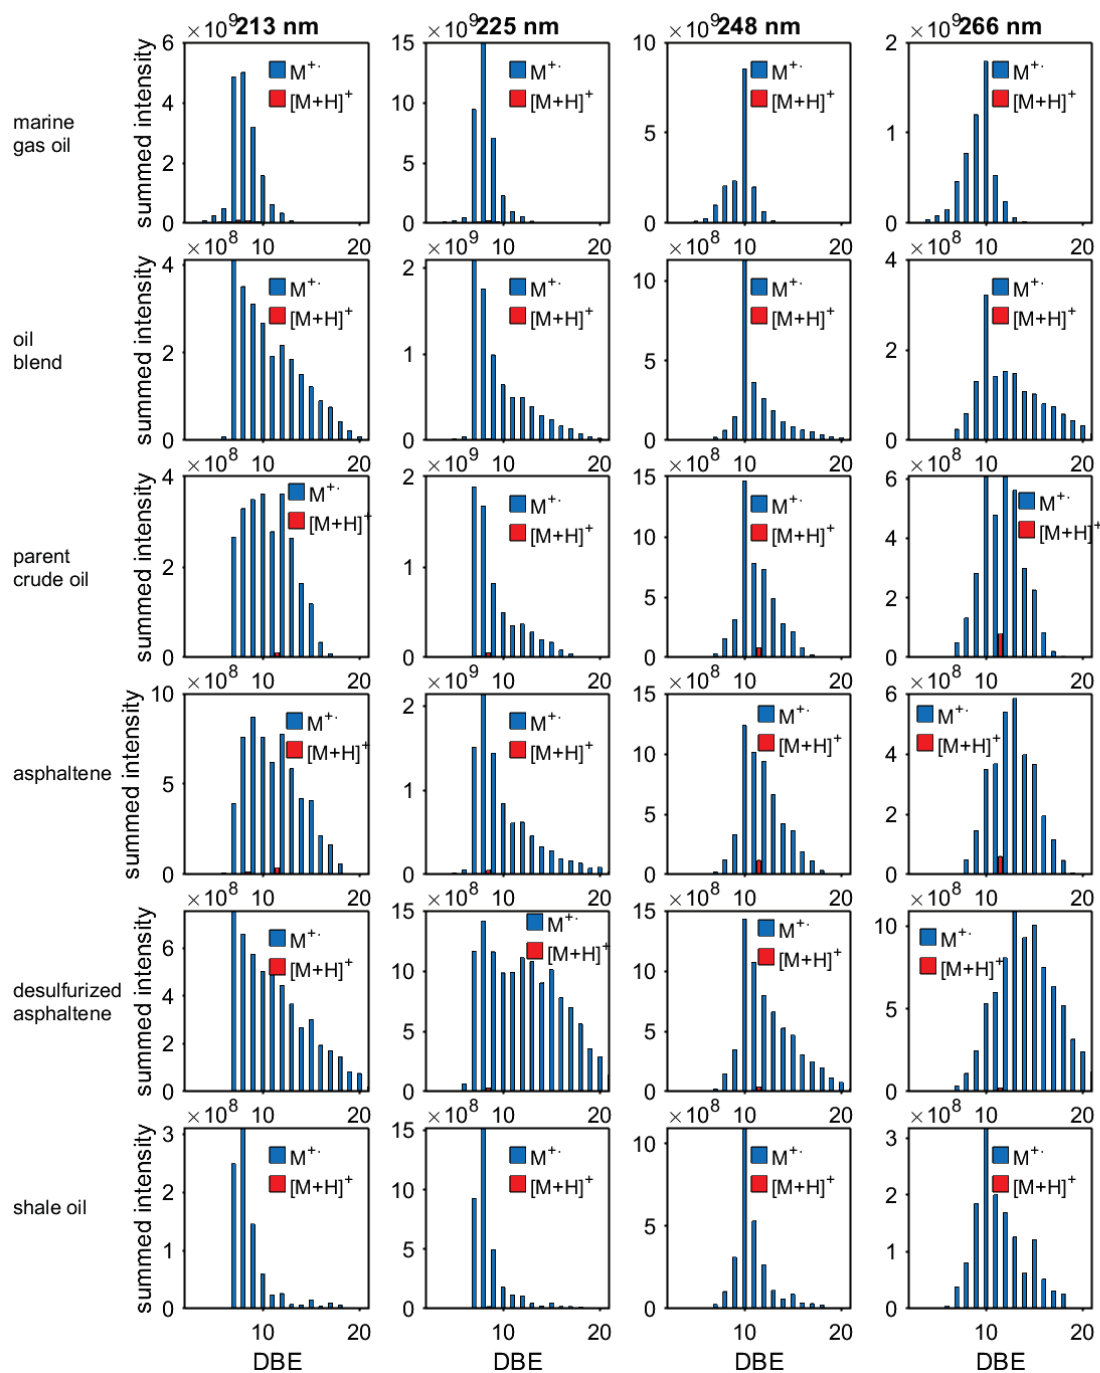

**Figure S07:** DBE Distribution of the CH class of the fossil oil samples measured at, going from left to right, 213 nm, 225 nm, 248 nm, and 266 nm. The red bars represent even electron species, while the blue ones represent odd electron species as visual guidance.

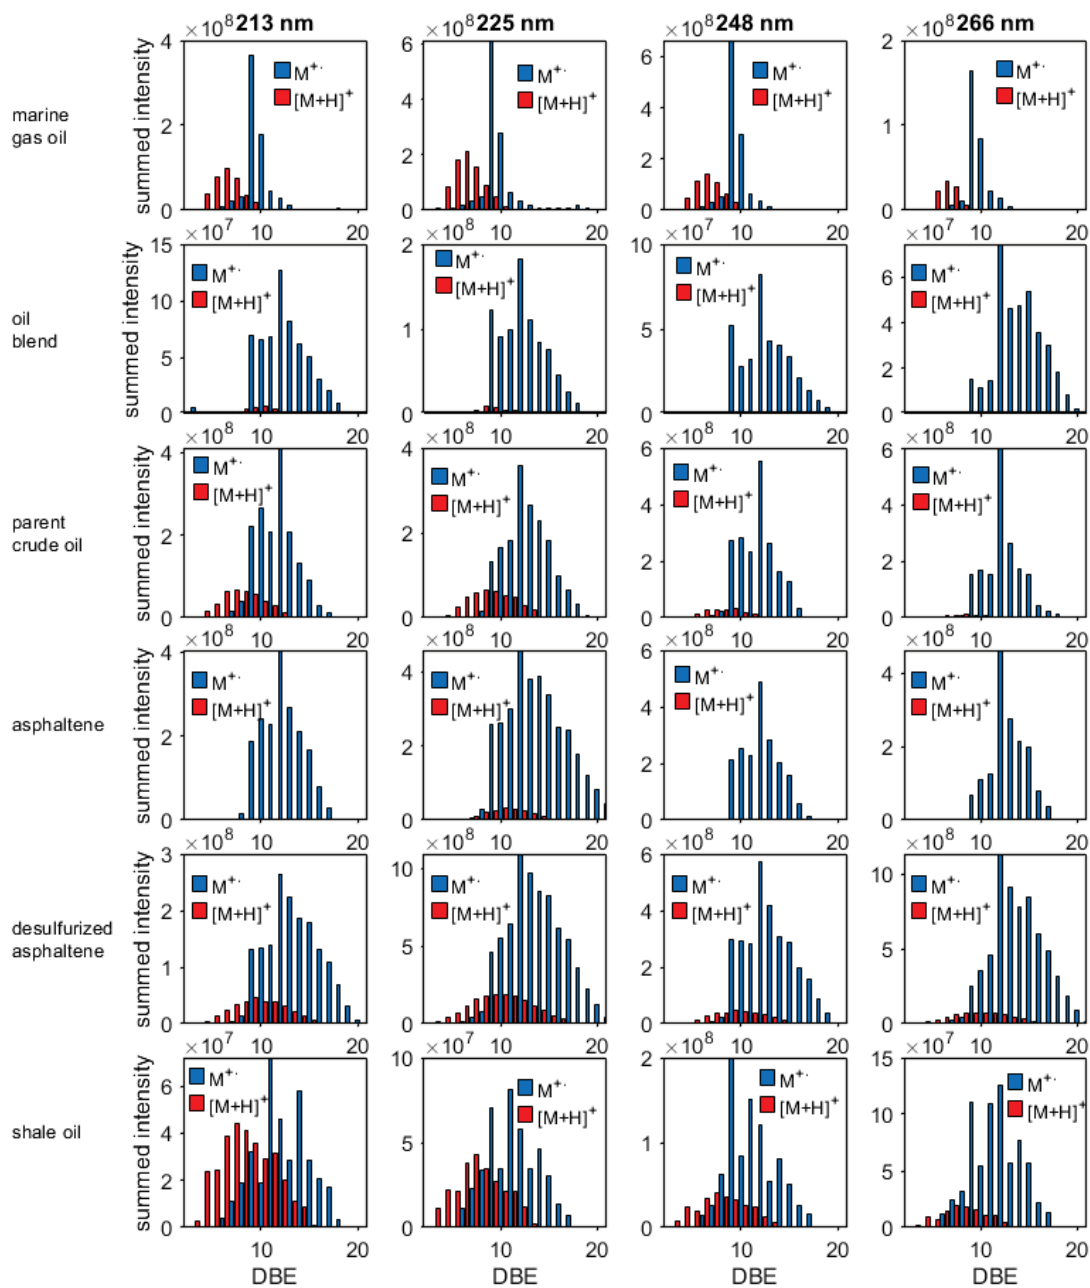

**Figure S08:** DBE Distribution of the CHN class of the fossil oil samples measured at, going from left to right, 213 nm, 225 nm, 248 nm, and 266 nm. The red bars represent even electron species, while the blue ones represent odd electron species as visual guidance.

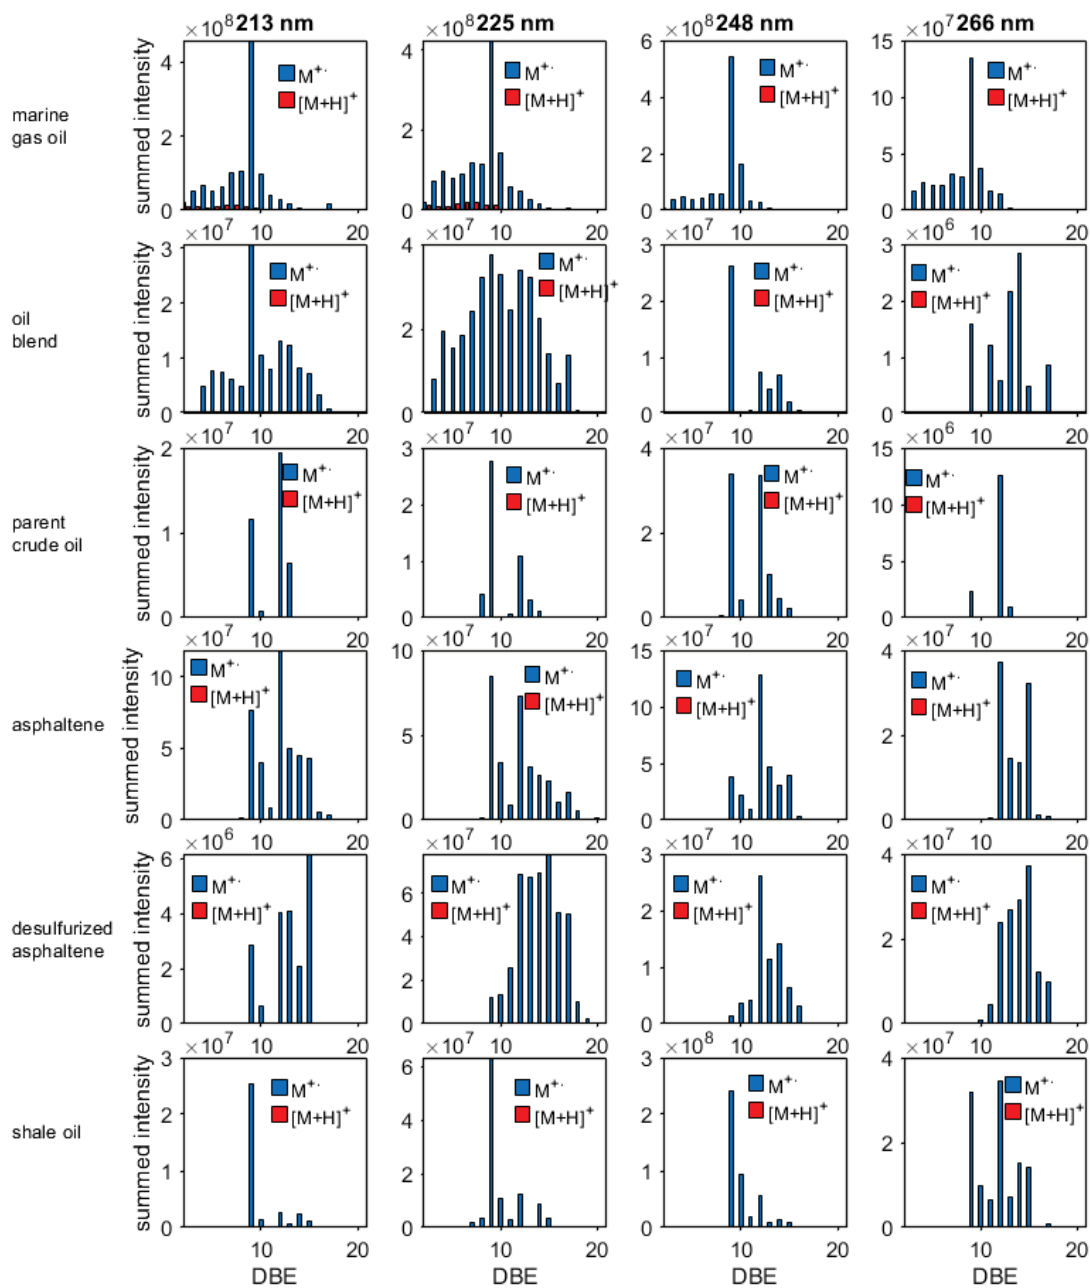

**Figure S09:** DBE Distribution of the CHO class of the fossil oil samples measured at, going from left to right, 213 nm, 225 nm, 248 nm, and 266 nm. The red bars represent even electron species, while the blue ones represent odd electron species as visual guidance.

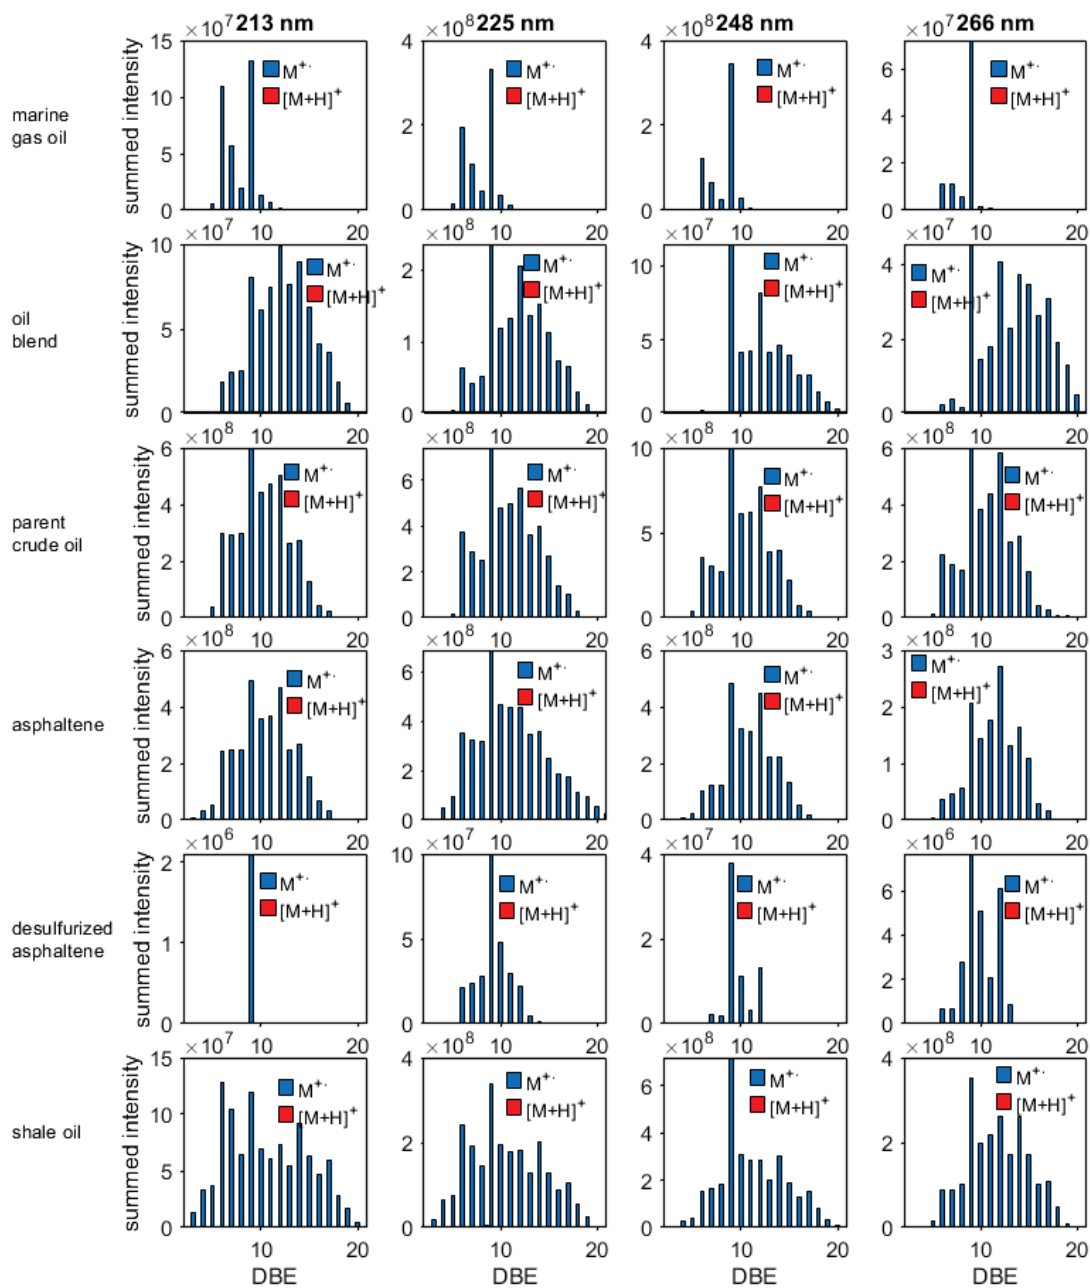

**Figure S10:** DBE Distribution of the CHS class of the fossil oil samples measured at, going from left to right, 213 nm, 225 nm, 248 nm, and 266 nm. The red bars represent even electron species, while the blue ones represent odd electron species as visual guidance.

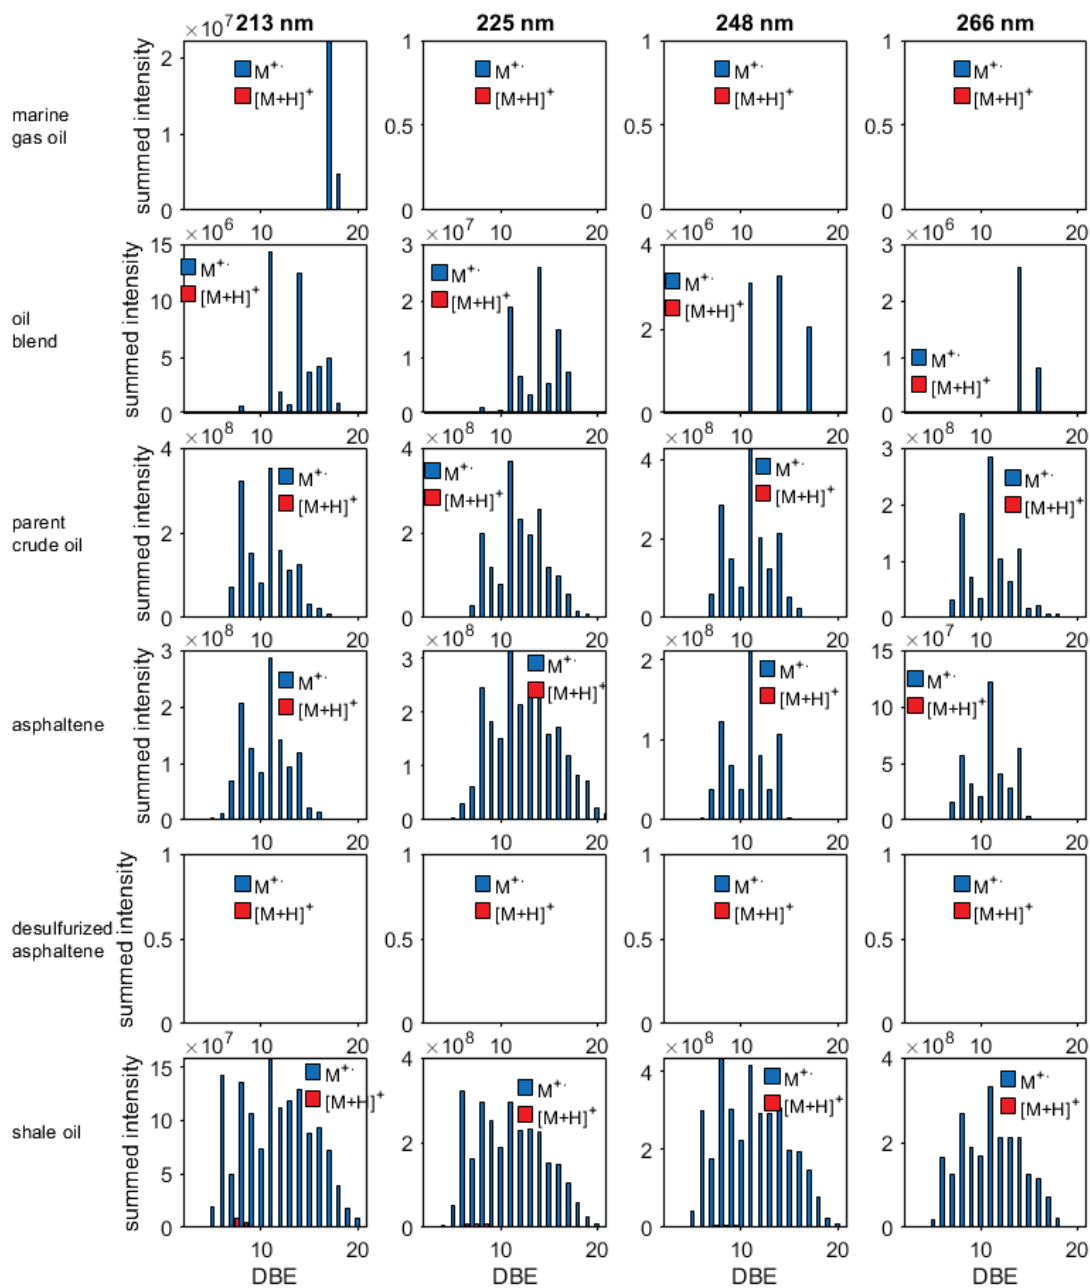

**Figure S11:** DBE Distribution of the  $\text{CH}_2$  class of the fossil oil samples measured at, going from left to right, 213 nm, 225 nm, 248 nm, and 266 nm. The red bars represent even electron species, while the blue ones represent odd electron species as visual guidance.

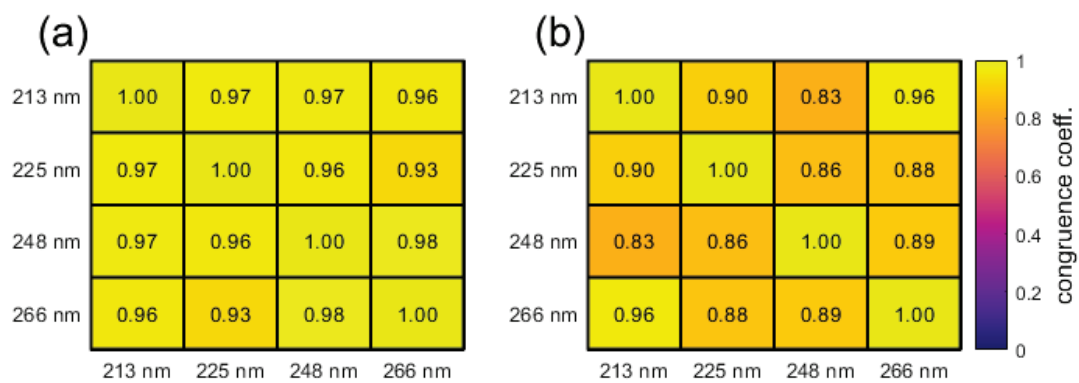

**Figure S12:** Congruence coefficients between polymer samples measured at different wavelengths for (a) polystyrene and (b) rubber.

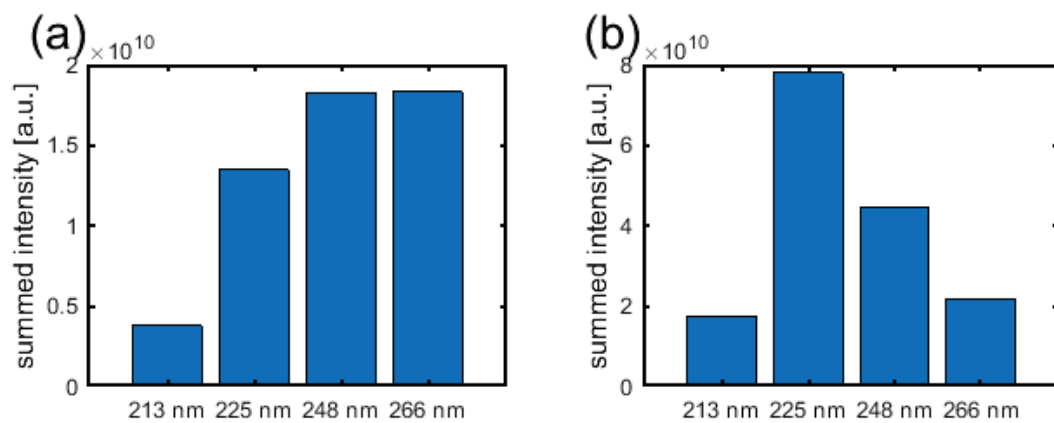

**Figure S13:** Total ion intensities of polymer samples measured at different wavelengths for (a) polystyrene and (b) rubber.
